# Supplementary material for: 19F and 1H quantitative-NMR spectroscopic analysis of fluorinated third-generation synthetic cannabinoids
Source: Royal Society of Chemistry journal article supplement (doi:10.1039/c9ay00814d), 2019-01-01
Supplement: c9ay00814d1.pdf [file c9ay00814d1.pdf]

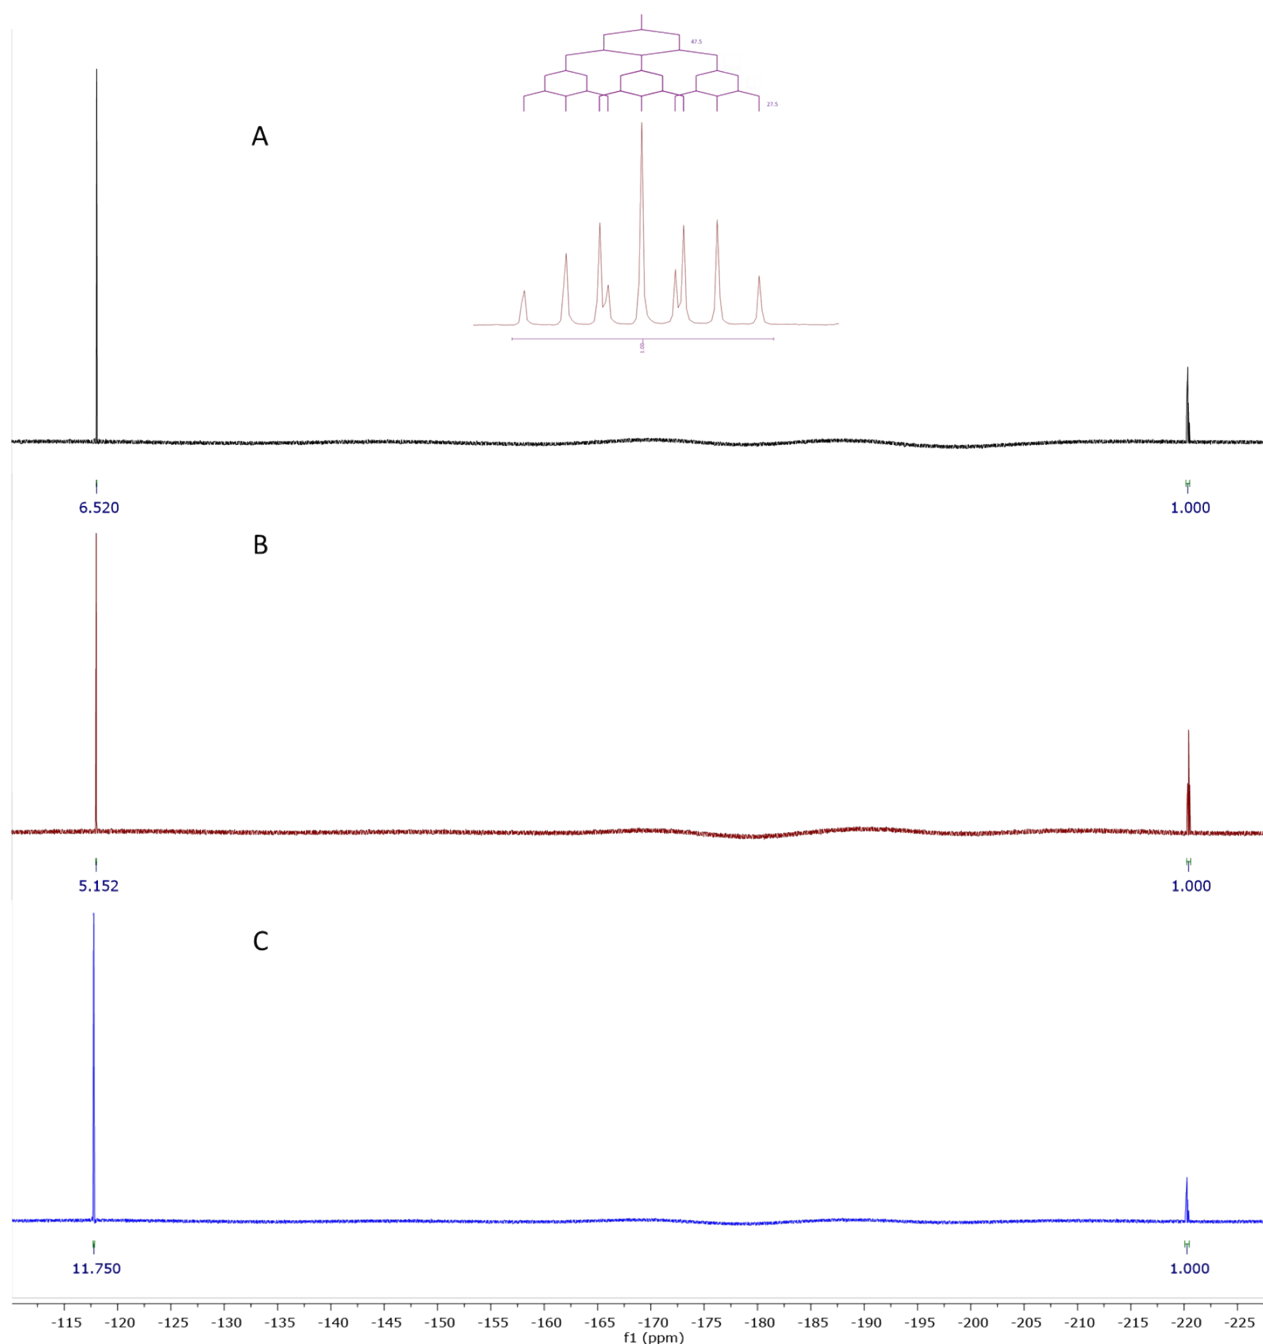

**Fig. S1**  $^{19}\text{F}$ -NMR ( $^1\text{H}$  coupled) stacked spectra of 5F-ADB with its  $^{19}\text{F}$  signal at -220.2 ppm and the IS 2-chloro-4-fluorotoluene (-117.8 ppm) with different O1P set at:  
(A) -165 ppm, (B) -220 ppm, (C) -117 ppm, with (inset) expansion of the of 5F-ADB  $^{19}\text{F}$  signal.



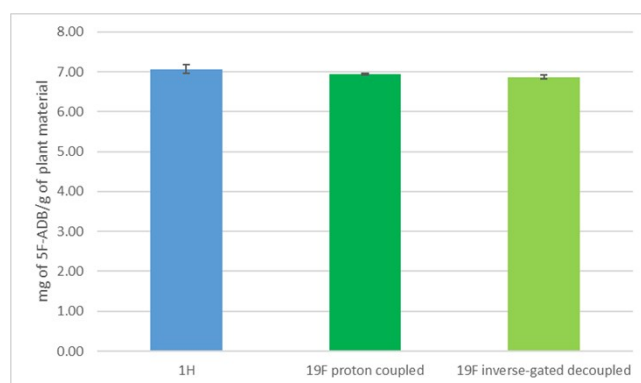

**Fig. S2** 5F-ADB quantified in a sample using  $^1\text{H}$ ,  $^{19}\text{F}$  proton coupled, and  $^{19}\text{F}$  inverse-gated decoupled spectroscopy.
